# Supplementary material for: FGF21 resistance is not mediated by downregulation of beta-klotho expression in white adipose tissue
Source: PubMed Central journal article supplement (PMC5444074; doi:10.1016/j.molmet.2017.03.009), 2017-03-27
Supplement: mmc1.pdf [file mmc1.pdf]

## SUPPLEMENTARY FIGURES AND TABLE

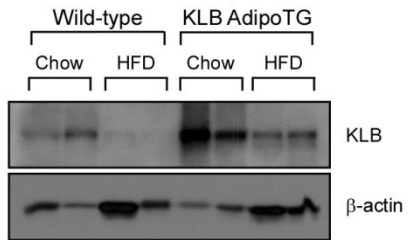

**Supplementary Figure 1.** Western blot analysis of KLB protein expression in epididymal white adipose tissue of wild-type (WT) and KLB adipose-specific transgenic mice (KLB AdipoTG) fed chow or HFD for 14 weeks.

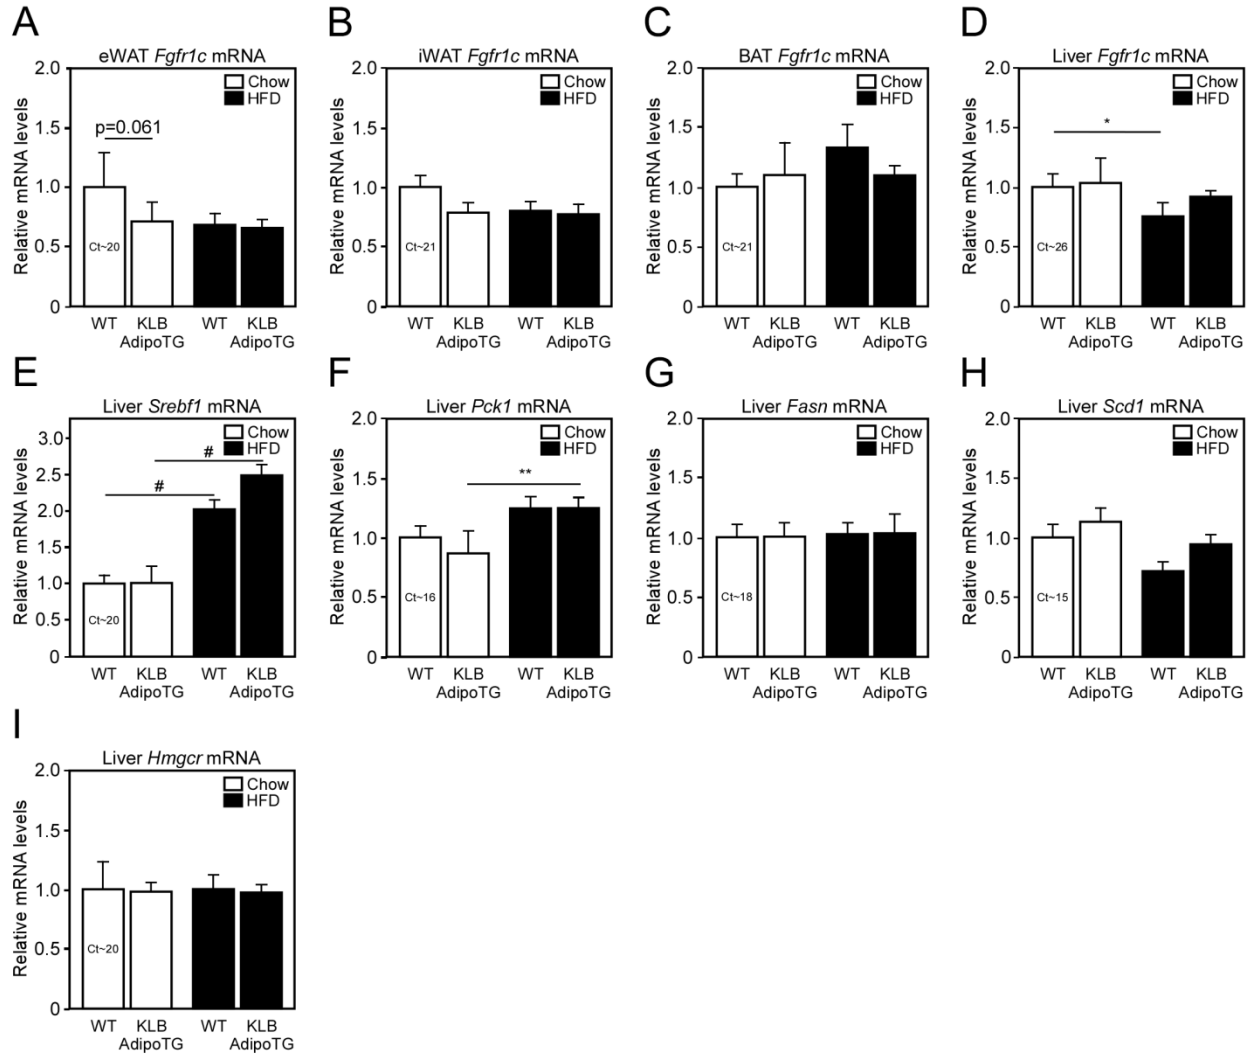

**Supplementary Figure 2.** Gene expression in wild-type (WT) and KLB adipose-specific transgenic mice (KLB AdipoTG) fed chow or HFD for 14 weeks as determined by QPCR. *Fgfr1c* mRNA expression in (A) epididymal white adipose tissue (eWAT), (B) inguinal white adipose tissue (iWAT), (C) interscapular brown adipose tissue, and (D) liver. Hepatic gene expression for (E) *Srebf1*, (F) *Pck1*, (G) *Fasn*, (H) *Scd1*, and (I) *Hmgcr*. Values are mean  $\pm$  SEM. (\*,  $P < 0.05$ ; \*\*,  $P < 0.01$ ; \*\*\*,  $P < 0.005$ ; and #,  $P < 0.001$  compared to WT).

**Supplementary Table 1 – Plasma parameters of KLB AdipoTG mice.** Plasma parameters of WT and KLB AdipoTG littermates on chow and high fat diet for 14 weeks. Data are presented as mean  $\pm$  SEM. (\*,  $P < 0.05$ ).

|                       | Chow Diet         |                    | High Fat Diet      |                     |
|-----------------------|-------------------|--------------------|--------------------|---------------------|
|                       | WT                | KLB AdipoTG        | WT                 | KLB AdipoTG         |
| n                     | 9                 | 8                  | 10                 | 9                   |
| Food Intake (g/day)   | 3.20 $\pm$ 0.10   | 3.26 $\pm$ 0.11    | 2.89 $\pm$ 0.09    | 2.91 $\pm$ 0.05     |
| Glucose (mg/dL)       | 171.27 $\pm$ 6.86 | 179.33 $\pm$ 8.84  | 215.93 $\pm$ 13.40 | 209.60 $\pm$ 10.82  |
| Triglycerides (mg/dL) | 102.14 $\pm$ 7.16 | 120.41 $\pm$ 14.43 | 94.05 $\pm$ 5.12   | 114.25 $\pm$ 6.83 * |
| NEFAs (mmol/L)        | 0.67 $\pm$ 0.04   | 0.66 $\pm$ 0.0     | 0.47 $\pm$ 0.04    | 0.52 $\pm$ 0.02     |
| Cholesterol (mg/dL)   | 128.86 $\pm$ 4.59 | 129.24 $\pm$ 4.69  | 231.58 $\pm$ 11.50 | 224.90 $\pm$ 11.29  |
| Total Ketones         | 64.11 $\pm$ 10.85 | 45.88 $\pm$ 4.19   | 79.10 $\pm$ 7.03   | 61.28 $\pm$ 3.86 *  |
